# Supplementary material for: Using financial incentives to promote physical activity in American Indian adolescents: A randomized controlled trial
Source: PLOS journal article supplement (doi:10.1371/journal.pone.0198390), 2018-06-01

**S1 Fig. Flow chart for Phase 3**

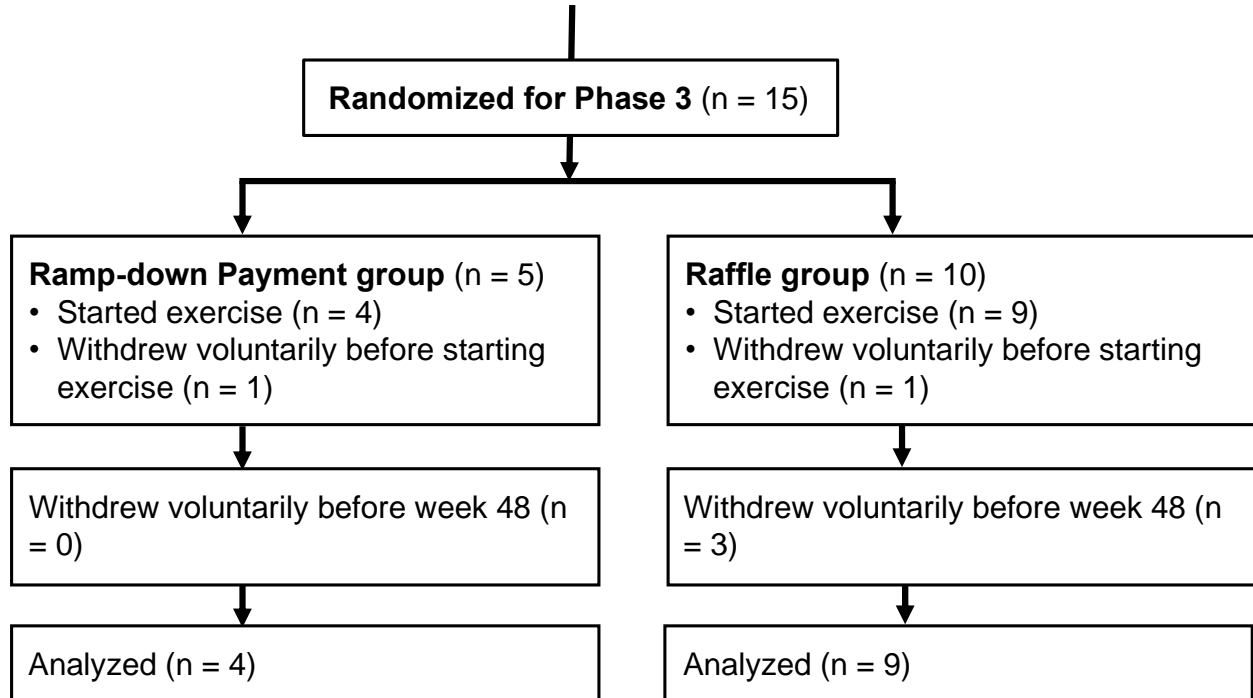

Supplement: S4 (10.1371/journal.pone.0198390.s004) [file journal.pone.0198390.s004]
